# Supplementary material for: Gene expression variations are predictive for stochastic noise
Source: PubMed Central journal article supplement — Nucleic Acids Res. 2010 Sep 21;39(2):403–13. doi: 10.1093/nar/gkq844 (PMC3025572; doi:10.1093/nar/gkq844), 2010-09-21
Supplement: supp_gkq844_SupplementaryData.pdf [file supp_gkq844_SupplementaryData.pdf]

## Supplementary Data

### Supplementary figure legend

#### Figure S1 The predicted “quiet” and “noisy” genes have different properties.

(A) The predicted “quiet” genes contain more haploinsufficient genes. (B) The predicted “quiet” genes contain more essential genes. (C) Protein interaction hubs (degree > 10) are highly enriched among the predicted “quiet” genes. Error bars represent 95<sup>th</sup> percentile confidence intervals from bootstrap re-sampling.

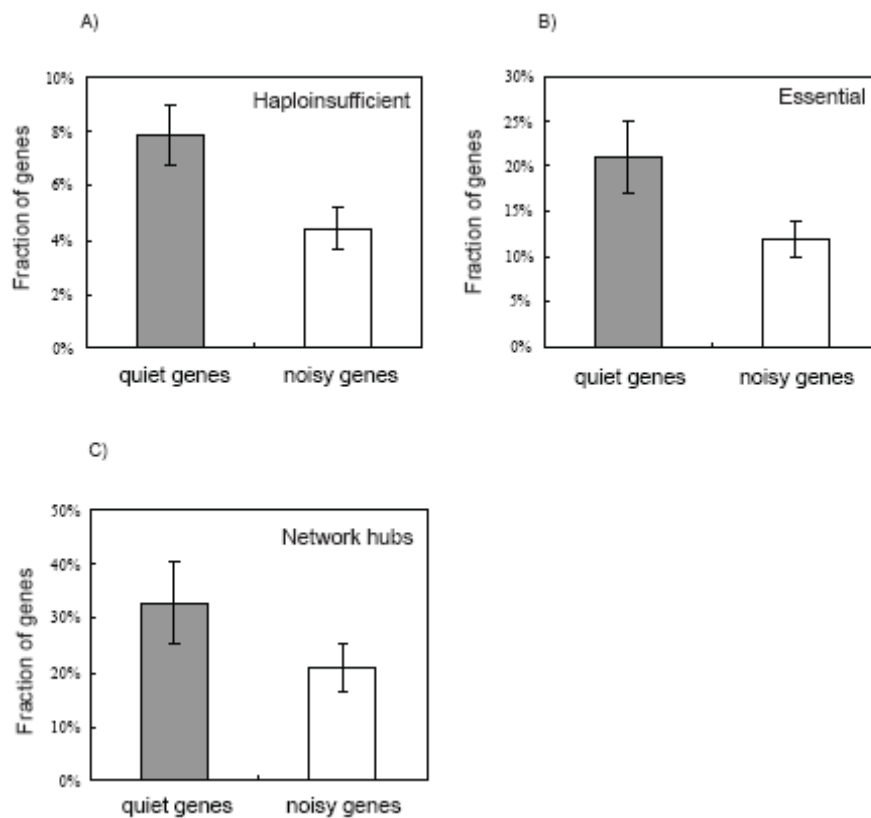

**Table S1** Enriched GO categories in ‘noisy’ and ‘quiet’ genes in the measured and modeled datasets

|            | GO ID        | GO term                                                               | FDR                                             | # of genes |    |
|------------|--------------|-----------------------------------------------------------------------|-------------------------------------------------|------------|----|
| BP         | GO:0008152   | metabolic process                                                     | 3.84E-08                                        | 85         |    |
|            | GO:0008652   | cellular amino acid biosynthetic process                              | 4.47E-06                                        | 32         |    |
|            | GO:0015986   | ATP synthesis coupled proton transport                                | 1.23E-05                                        | 17         |    |
|            | GO:0006096   | glycolysis                                                            | 3.73E-05                                        | 16         |    |
|            | GO:0042309   | homeiothermy                                                          | 1.47E-04                                        | 14         |    |
|            | GO:0006811   | ion transport                                                         | 2.68E-04                                        | 29         |    |
|            | GO:0050826   | response to freezing                                                  | 3.10E-04                                        | 14         |    |
|            | GO:0015992   | proton transport                                                      | 1.12E-03                                        | 14         |    |
|            | GO:0001302   | replicative cell aging                                                | 1.30E-02                                        | 10         |    |
|            | GO:0006970   | response to osmotic stress                                            | 1.55E-02                                        | 12         |    |
|            | GO:0006979   | response to oxidative stress                                          | 1.68E-02                                        | 15         |    |
|            | GO:0005975   | carbohydrate metabolic process                                        | 2.02E-02                                        | 24         |    |
|            | GO:0009058   | biosynthetic process                                                  | 2.69E-02                                        | 12         |    |
|            | GO:0006950   | response to stress                                                    | 3.61E-02                                        | 30         |    |
|            | noisy' genes | GO:0016491                                                            | oxidoreductase activity                         | 8.45E-11   | 90 |
| GO:0003824 |              | catalytic activity                                                    | 2.22E-06                                        | 107        |    |
| GO:0050825 |              | ice binding                                                           | 5.14E-04                                        | 14         |    |
| GO:0046933 |              | hydrogen ion transporting ATP synthase activity, rotational mechanism | 7.39E-04                                        | 14         |    |
| MF         |              | GO:0015078                                                            | hydrogen ion transmembrane transporter activity | 1.04E-03   | 14 |
| GO:0005506 |              | iron ion binding                                                      | 7.50E-03                                        | 30         |    |
| GO:0030170 |              | pyridoxal phosphate binding                                           | 1.87E-02                                        | 13         |    |
| GO:0003779 |              | actin binding                                                         | 2.80E-02                                        | 10         |    |
| GO:0046961 |              | proton-transporting ATPase activity, rotational mechanism             | 3.47E-02                                        | 10         |    |
| CC         |              | GO:0005886                                                            | plasma membrane                                 | 8.47E-03   | 40 |
|            | GO:0016469   | proton-transporting two-sector ATPase complex                         | 1.44E-02                                        | 10         |    |
|            | GO:0030479   | actin cortical patch                                                  | 1.85E-02                                        | 12         |    |
|            | GO:0009277   | fungal-type cell wall                                                 | 2.36E-03                                        | 22         |    |
|            | GO:0005739   | mitochondrion                                                         | 1.12E-07                                        | 197        |    |
|            | GO:0005759   | mitochondrial matrix                                                  | 4.71E-07                                        | 25         |    |
|            | GO:0005762   | mitochondrial large ribosomal subunit                                 | 4.06E-03                                        | 14         |    |

|  |    |            |                                                        |          |     |
|--|----|------------|--------------------------------------------------------|----------|-----|
|  |    | GO:0006412 | translation                                            | 1.34E-14 | 183 |
|  |    | GO:0042254 | ribosome biogenesis                                    | 2.50E-12 | 126 |
|  |    | GO:0006364 | rRNA processing                                        | 1.07E-06 | 86  |
|  |    | GO:0015031 | protein transport                                      | 1.34E-06 | 153 |
|  |    | GO:0006888 | ER to Golgi vesicle-mediated transport                 | 2.33E-06 | 45  |
|  |    | GO:0006402 | mRNA catabolic process                                 | 1.42E-05 | 23  |
|  |    | GO:0006368 | RNA elongation from RNA polymerase II promoter         | 1.90E-04 | 28  |
|  |    | GO:0000027 | ribosomal large subunit assembly                       | 3.39E-04 | 22  |
|  | BP | GO:0000723 | telomere maintenance                                   | 4.43E-04 | 101 |
|  |    | GO:0006897 | endocytosis                                            | 9.19E-04 | 37  |
|  |    | GO:0006886 | intracellular protein transport                        | 1.46E-03 | 49  |
|  |    | GO:0007121 | bipolar cellular bud site selection                    | 1.85E-03 | 18  |
|  |    | GO:0008610 | lipid biosynthetic process                             | 2.53E-03 | 23  |
|  |    | GO:0006887 | exocytosis                                             | 4.52E-03 | 20  |
|  |    | GO:0051028 | mRNA transport                                         | 6.55E-03 | 25  |
|  |    | GO:0016192 | vesicle-mediated transport                             | 7.07E-03 | 61  |
|  |    | GO:0065002 | intracellular protein transmembrane transport          | 7.77E-03 | 30  |
|  |    | GO:0006417 | regulation of translation                              | 9.93E-03 | 16  |
|  |    | GO:0003735 | structural constituent of ribosome                     | 8.62E-09 | 121 |
|  | MF | GO:0003743 | translation initiation factor activity                 | 1.97E-03 | 22  |
|  |    | GO:0008565 | protein transporter activity                           | 5.92E-03 | 40  |
|  |    | GO:0004175 | endopeptidase activity                                 | 8.50E-03 | 17  |
|  |    | GO:0005840 | ribosome                                               | 1.43E-11 | 132 |
|  |    | GO:0005935 | cellular bud neck                                      | 8.36E-03 | 39  |
|  |    | GO:0005794 | Golgi apparatus                                        | 1.55E-05 | 85  |
|  |    | GO:0030529 | ribonucleoprotein complex                              | 5.68E-14 | 154 |
|  | CC | GO:0005622 | intracellular                                          | 9.25E-05 | 174 |
|  |    | GO:0043234 | protein complex                                        | 1.02E-04 | 25  |
|  |    | GO:0005643 | nuclear pore                                           | 3.56E-02 | 25  |
|  |    | GO:0005730 | nucleolus                                              | 3.04E-05 | 79  |
|  |    | GO:0005737 | cytoplasm                                              | 5.45E-08 | 627 |
|  |    | GO:0005829 | cytosol                                                | 4.69E-03 | 72  |
|  |    | GO:0005975 | carbohydrate metabolic process                         | 1.9E-05  | 26  |
|  |    | GO:0030435 | sporulation resulting in formation of a cellular spore | 4.7E-04  | 21  |
|  | BP | GO:0008643 | carbohydrate transport                                 | 4.0E-03  | 10  |
|  |    | GO:0030476 | ascospore wall assembly                                | 1.0E-02  | 10  |
|  |    | GO:0008152 | metabolic process                                      | 1.8E-02  | 46  |

|    |            |                                                          |         |     |
|----|------------|----------------------------------------------------------|---------|-----|
|    | GO:0005215 | transporter activity                                     | 9.1E-05 | 28  |
|    | GO:0005351 | sugar:hydrogen symporter activity                        | 9.2E-03 | 10  |
| MF | GO:0003700 | transcription factor activity                            | 1.3E-02 | 27  |
|    | GO:0043565 | sequence-specific DNA binding                            | 3.7E-02 | 14  |
|    | GO:0050660 | FAD binding                                              | 4.2E-02 | 8   |
| CC | GO:0005618 | cell wall                                                | 1.4E-02 | 14  |
|    | GO:0009277 | fungal-type cell wall                                    | 4.1E-05 | 21  |
|    | GO:0006281 | DNA repair                                               | 6.0E-07 | 97  |
|    | GO:0006974 | response to DNA damage stimulus                          | 1.3E-05 | 94  |
|    | GO:0000398 | nuclear mRNA splicing, via spliceosome                   | 8.3E-04 | 40  |
|    | GO:0006355 | regulation of transcription, DNA-dependent               | 1.1E-03 | 210 |
|    | GO:0000070 | mitotic sister chromatid segregation                     | 3.2E-03 | 22  |
|    | GO:0008380 | RNA splicing                                             | 4.5E-03 | 51  |
|    | GO:0006397 | mRNA processing                                          | 5.0E-03 | 74  |
|    | GO:0007126 | meiosis                                                  | 6.6E-03 | 64  |
|    | GO:0006289 | nucleotide-excision repair                               | 6.6E-03 | 18  |
| BP | GO:0007131 | reciprocal meiotic recombination                         | 7.1E-03 | 23  |
|    | GO:0006914 | autophagy                                                | 8.3E-03 | 21  |
|    | GO:0007049 | cell cycle                                               | 8.4E-03 | 132 |
|    | GO:0007067 | mitosis                                                  | 1.5E-02 | 57  |
|    | GO:0006260 | DNA replication                                          | 2.5E-02 | 40  |
|    | GO:0006623 | protein targeting to vacuole                             | 3.2E-02 | 30  |
|    | GO:0006350 | transcription                                            | 3.4E-02 | 200 |
|    | GO:0006367 | transcription initiation from RNA polymerase II promoter | 4.1E-02 | 22  |
|    | GO:0051301 | cell division                                            | 4.2E-02 | 77  |
| MF | GO:0016251 | general RNA polymerase II transcription factor activity  | 4.4E-02 | 23  |
|    | GO:0000778 | condensed nuclear chromosome kinetochore                 | 3.9E-02 | 18  |
| CC | GO:0000781 | chromosome, telomeric region                             | 5.7E-03 | 25  |
|    | GO:0005681 | spliceosomal complex                                     | 3.2E-05 | 37  |

**Table S2** Enriched GO categories in noise diverged genes and noise conserved genes.

|                       | GO ID                                                                                 | GO term                                            | FDR                    | # of genes |
|-----------------------|---------------------------------------------------------------------------------------|----------------------------------------------------|------------------------|------------|
| Noise conserved genes | GO:0006807                                                                            | nitrogen compound metabolic process                | 4.6E-02                | 15         |
|                       | GO:0006890                                                                            | retrograde vesicle-mediated transport, Golgi to ER | 1.5E-02                | 21         |
|                       | GO:0006166                                                                            | purine ribonucleoside salvage                      | 1.3E-02                | 9          |
|                       | GO:0007118                                                                            | budding cell apical bud growth                     | 1.7E-02                | 12         |
|                       | BP GO:0006511                                                                         | ubiquitin-dependent protein catabolic process      | 3.0E-02                | 58         |
|                       | GO:0009116                                                                            | nucleoside metabolic process                       | 4.0E-02                | 10         |
|                       | GO:0009165                                                                            | nucleotide biosynthetic process                    | 1.3E-02                | 9          |
|                       | GO:0046686                                                                            | response to cadmium ion                            | 2.1E-02                | 8          |
|                       | GO:0000162                                                                            | tryptophan biosynthetic process                    | 8.2E-03                | 10         |
|                       | MF                                                                                    | GO:0004175                                         | endopeptidase activity | 7.9E-03    |
|                       | GO:0004298                                                                            | threonine-type endopeptidase activity              | 6.1E-03                | 14         |
| Noise diverged genes  | GO:0019773                                                                            | proteasome core complex, alpha-subunit complex     | 4.9E-02                | 7          |
|                       | GO:0019774                                                                            | proteasome core complex, beta-subunit complex      | 4.9E-02                | 7          |
|                       | CC GO:0032045                                                                         | guanyl-nucleotide exchange factor complex          | 4.9E-02                | 7          |
|                       | GO:0043234                                                                            | protein complex                                    | 2.4E-02                | 33         |
|                       | GO:0005839                                                                            | proteasome core complex                            | 1.4E-02                | 14         |
|                       | GO:0007243                                                                            | protein kinase cascade                             | 1.7E-02                | 3          |
|                       | GO:0045721                                                                            | negative regulation of gluconeogenesis             | 1.1E-02                | 6          |
|                       | GO:0006102                                                                            | isocitrate metabolic process                       | 1.7E-02                | 4          |
|                       | BP GO:0016126                                                                         | sterol biosynthetic process                        | 4.6E-02                | 12         |
|                       | GO:0006528                                                                            | asparagine metabolic process                       | 1.7E-02                | 4          |
| GO:0005993            | trehalose catabolic process                                                           | 1.7E-02                                            | 3                      |            |
| GO:0006995            | cellular response to nitrogen starvation                                              | 1.7E-02                                            | 4                      |            |
| GO:0015293            | symporter activity                                                                    | 9.0E-03                                            | 6                      |            |
| GO:0016616            | oxidoreductase activity, acting on the CH-OH group of donors, NAD or NADP as acceptor | 7.7E-03                                            | 13                     |            |
| MF                    | GO:0004338                                                                            | glucan 1,3-beta-glucosidase activity               | 6.8E-03                | 4          |
|                       | GO:0004555                                                                            | alpha,alpha-trehalase activity                     | 2.4E-02                | 3          |
|                       | GO:0004067                                                                            | asparaginase activity                              | 2.6E-02                | 4          |
|                       | GO:0004450                                                                            | isocitrate dehydrogenase (NADP+) activity          | 2.4E-02                | 3          |
|                       | GO:0008023                                                                            | transcription elongation factor complex            | 2.0E-02                | 9          |
|                       | GO:0000145                                                                            | exocyst                                            | 3.7E-02                | 5          |
